# Supplementary material for: An integrally underwater self-healable droplet-based triboelectric nanogenerator
Source: Royal Society of Chemistry journal article supplement (doi:10.1039/d2ta00629d), 2022-01-01
Supplement: d2ta00629d1.pdf [file d2ta00629d1.pdf]

## **Supporting Information**

### **An integrally underwater self-healable droplet-based triboelectric nanogenerator.**

Ning Wang,<sup>a</sup> Ling Zhang,<sup>\*a</sup> Jin Liu<sup>a</sup> and Chunzhong Li<sup>\*a</sup>

<sup>a</sup> Key Laboratory for Ultrafine Materials of Ministry of Education, Shanghai Engineering Research Center of Hierarchical Nanomaterials, Frontiers Science Center for Materiobiology and Dynamic Chemistry, School of Chemical Engineering, East China University of Science & Technology, Shanghai 200237, China. E-mail: zlingzi@ecust.edu.cn, czli@ecust.edu.cn.

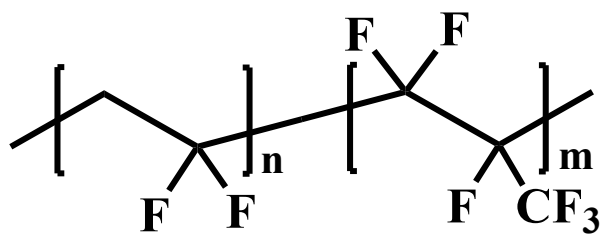

Figure S1. The chemical structures of PVDF-HFP.

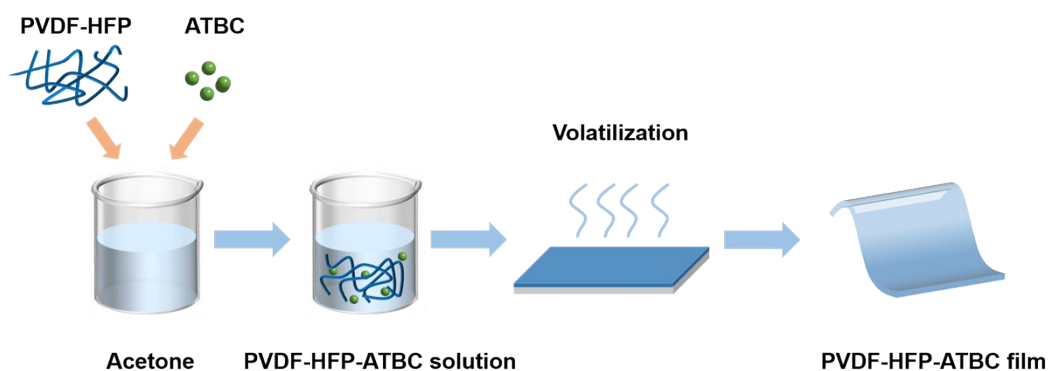

Figure S2. The preparation process of PVDF-HFP-15 wt% ATBC self-healing material.

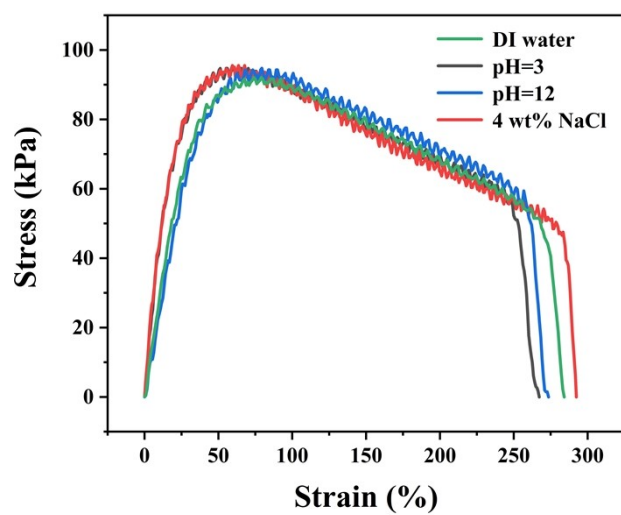

Figure S3. Typical stress-strain curves of healed PVDF-HFP-15 wt% ATBC complex after healing for 14 h in pH=3, pH=12, 4 wt% NaCl solution and DI water.

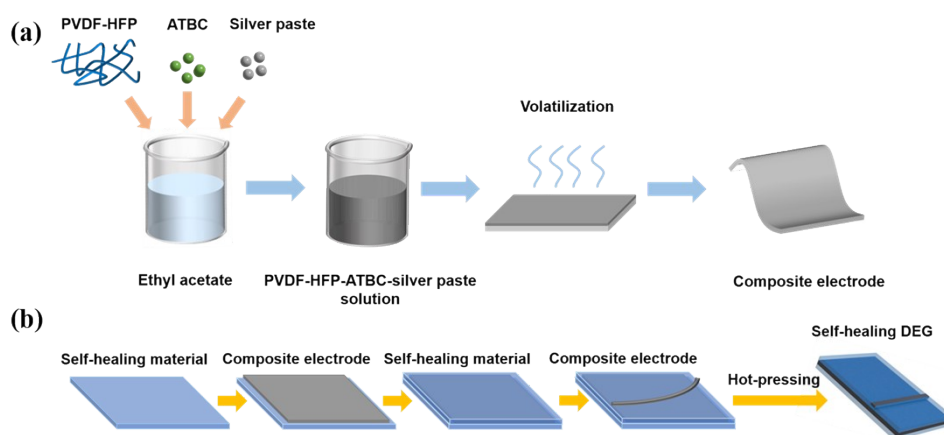

Figure S4. The preparation process of the (a) composite electrode and (b) SHD-TENG.

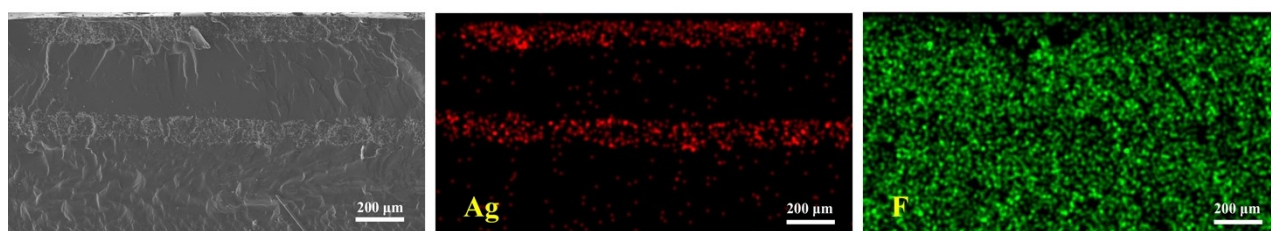

Figure S5. EDS analysis of SHD-TENG.

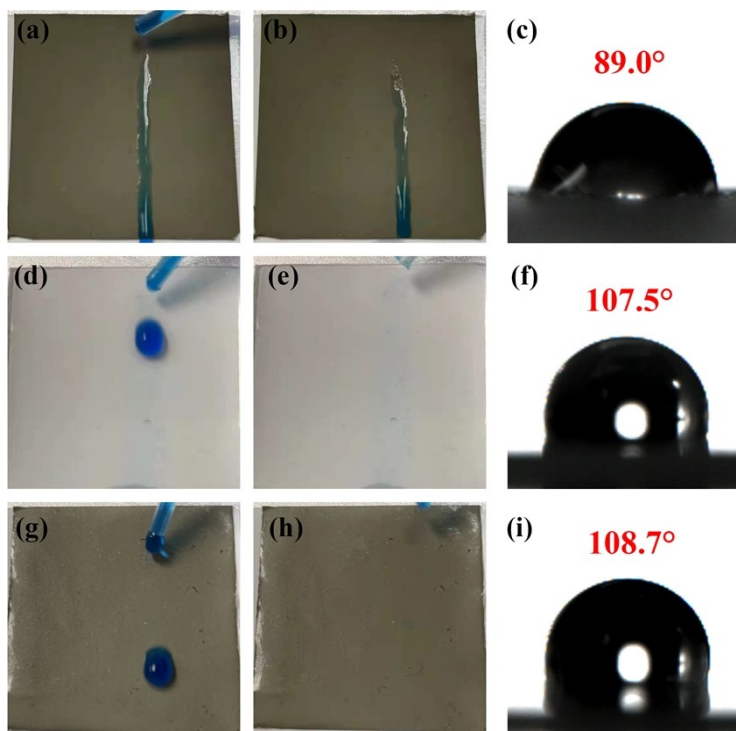

Figure S6. Optical images of sliding water droplets and contact angles on surfaces of (a-c) solidified silver paste, (d-f) PVDF-HFP-ATBC self-healing material and (g-i) silver paste/PVDF-HFP-ATBC composite electrode.

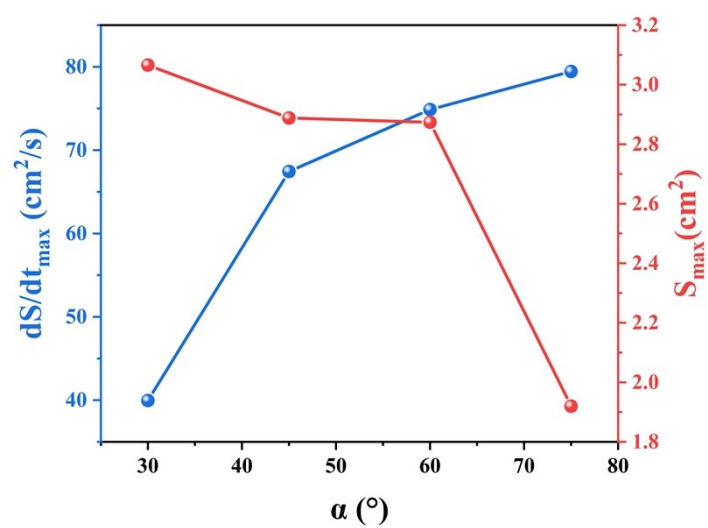

Figure S7. Change of  $S_{\max}$  and  $dS/dt_{\max}$  with varied inclination angle of the SHD-TENG.

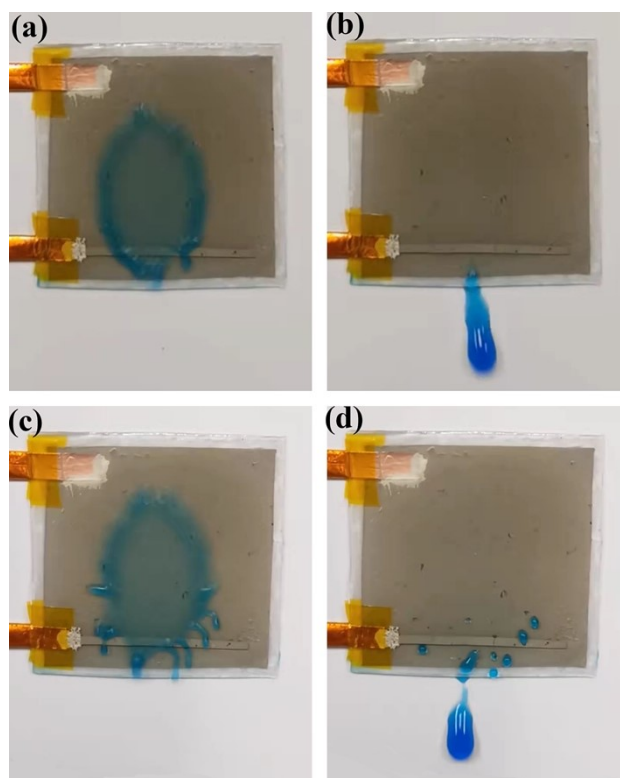

Figure S8. The shape of droplet when it is impinging and sliding across the surface of SHD-TENG with the droplet location of (a-b) 25 cm and (c-d) 35 cm.

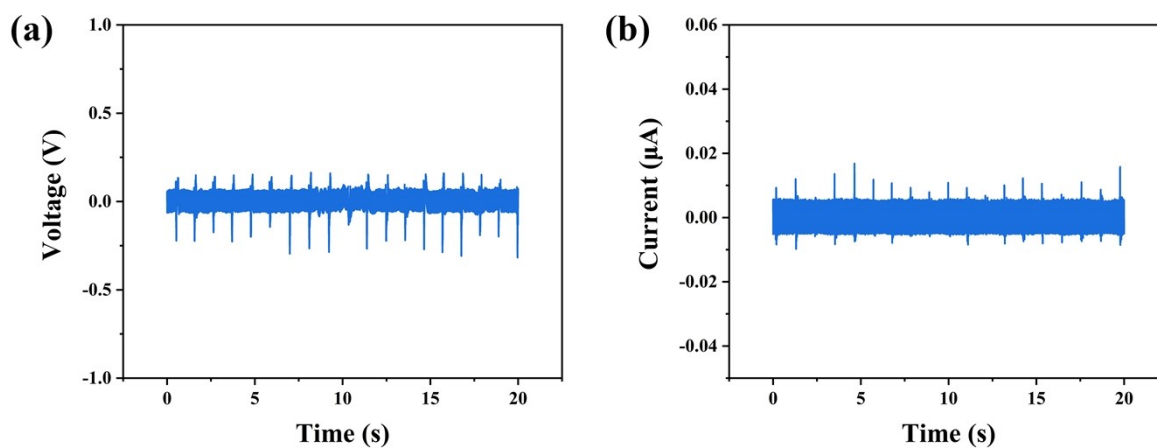

Figure S9. (a) Open-circuit voltage and (b) short-circuit current of droplet-based TENG with single electrode structure.

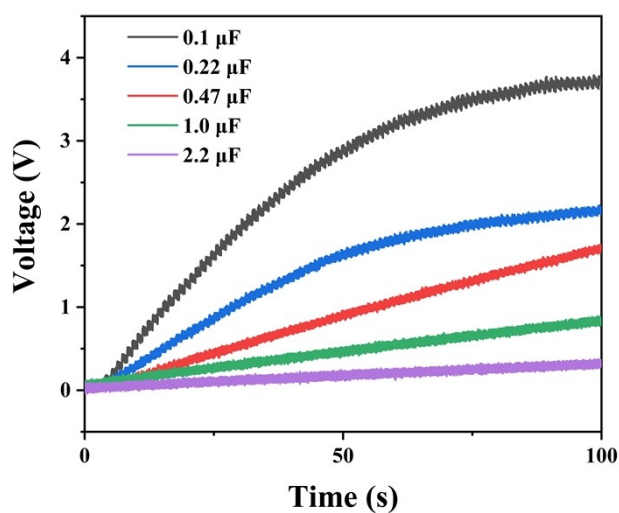

Figure S10. Charging curves of different capacitors charged by the SHD-TENG.

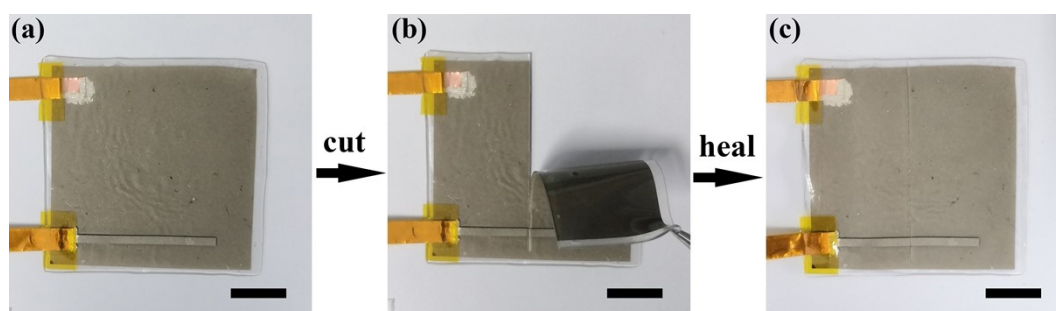

Figure S11. Digital photo of the (a) as-prepared, (b) damaged, and (c) self-healed SHD-TENG under the condition at 25  $^{\circ}\text{C}$  in water for 12 h. The scale bar is 1 cm.

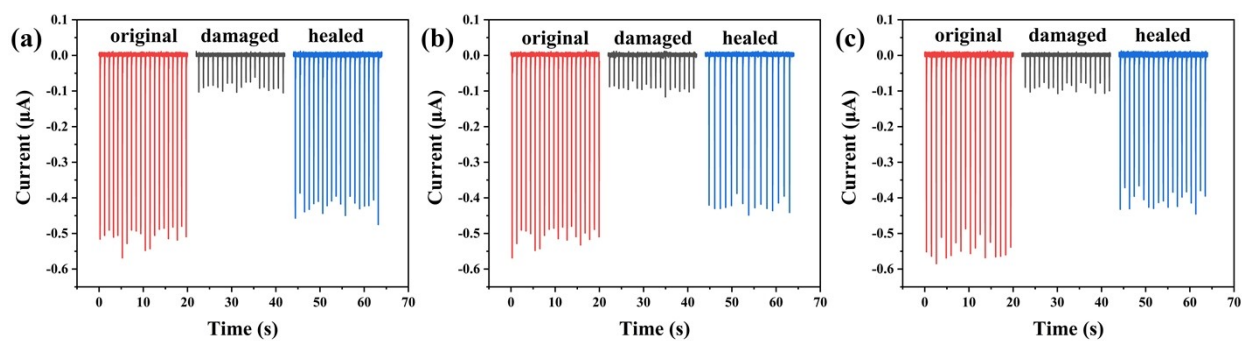

Figure S12. Short-circuit current of the SHD-TENG in the original, damaged, and healed states under the condition at (a) 25 °C in air for 12 h, (b) 60 °C in air for 3 h and (c) 25 °C in water for 12 h.
